# Supplementary material for: Comparative Characterization of Iron and Silver Nanoparticles: Extract-Stabilized and Classical Synthesis Methods
Source: MDPI journal article supplement (doi:10.3390/ijms24119274), 2023-05-25
Supplement: s1 [file s1]

## Comparative Characterization of Iron and Silver Nanoparticles: Extract-stabilized and Classical Synthesis Methods

Farida Akhatova, Svetlana Konnova, Marina Kryuchkova, Svetlana Batasheva, Kristina Mazurova, Anna Vikulina, Dmitry Volodkin, Elvira Rozhina

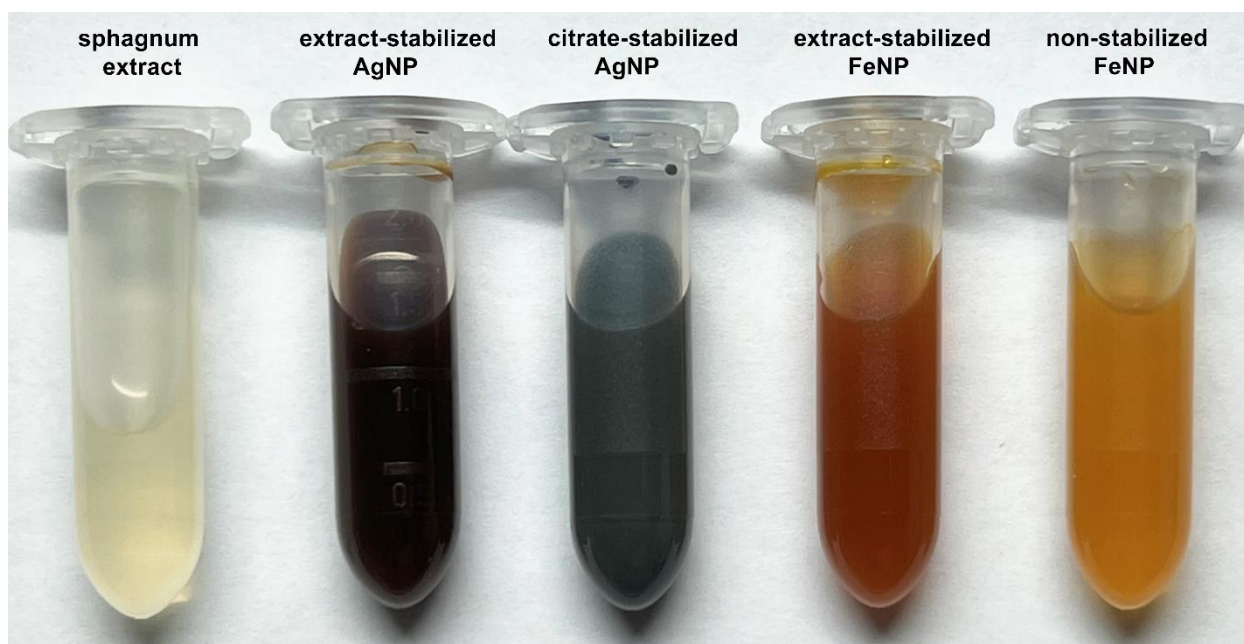

**Figure S1.** The images of the sphagnum extract and synthesized silver and iron nanoparticles.

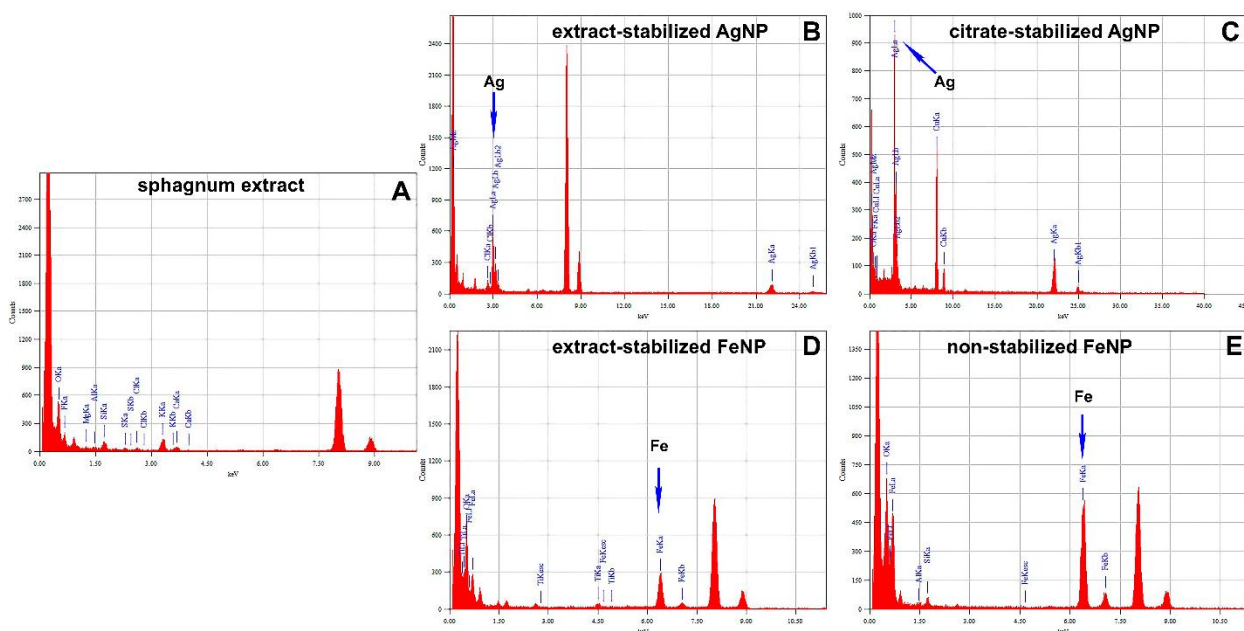

**Figure S2.** EDS spectrum of sphagnum extract (A), extract-stabilized AgNPs (B), citrate-stabilized AgNPs (C), extract-stabilized FeNPs (D), and non-stabilized FeNPs (E).

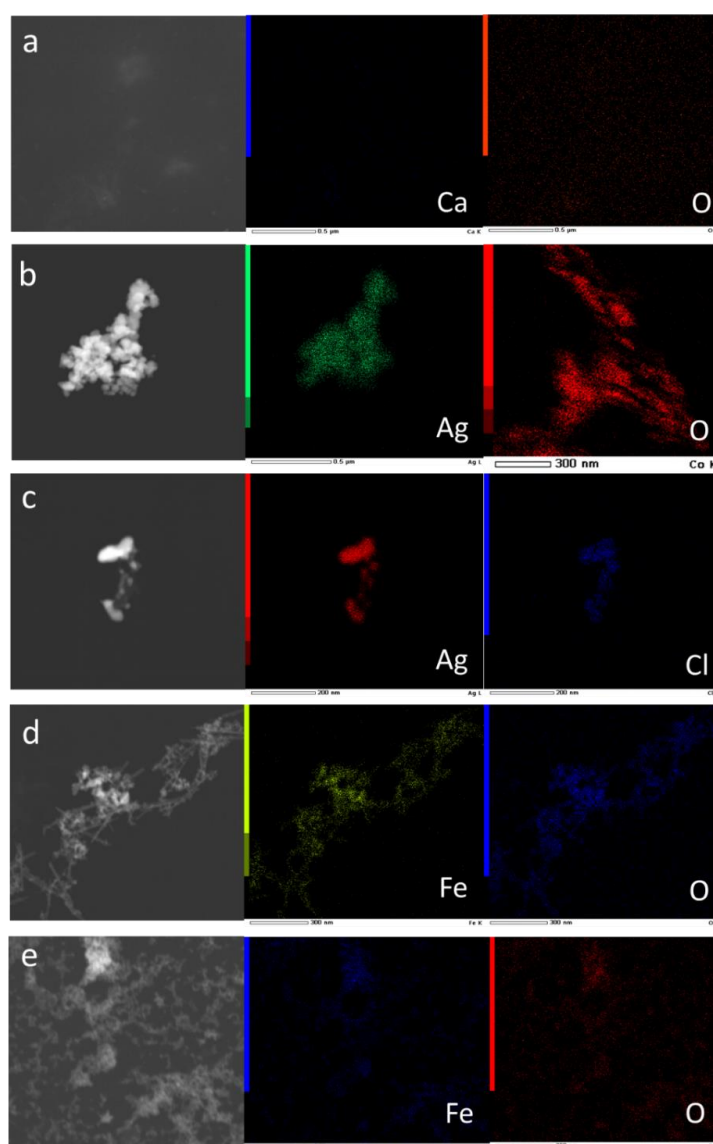

**Figure S3.** STEM images and elemental mapping of the Sphagnum extract (a), citrate-stabilized AgNPs (b), extract-stabilized AgNPs (c), non-stabilized FeNPs (d), extract-stabilized FeNPs (c).

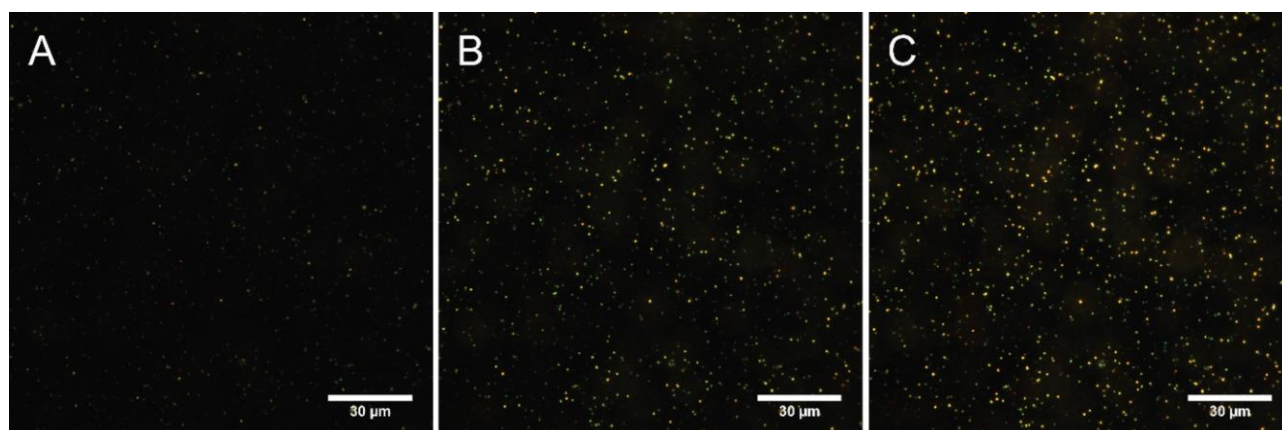

**Figure S4.** Dark-field images of extract-stabilized silver nanoparticles at 0 min (A), 10 min (B) and 20 min (C) from the beginning of observation.

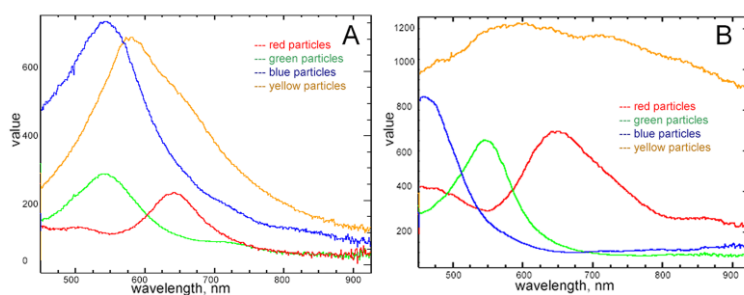

**Figure S5.** Hyperspectral profiles of extract-stabilized(A) and non-stabilized (B) silver nanoparticles of different colors.

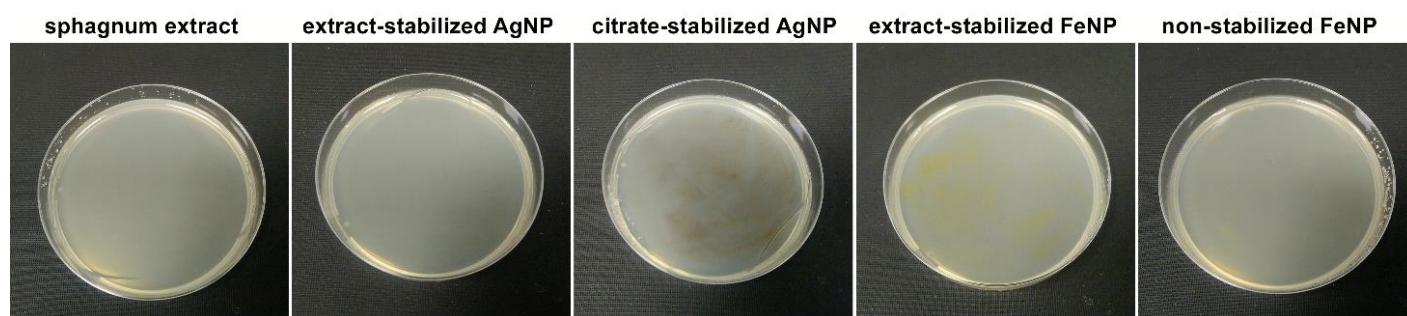

**Figure S6.** Petri dishes with nutrient medium inoculated with the Sphagnum extract or nanoparticles after 24h of cultivation.

**Video S1.** Video of the extract-stabilized nanoparticles maturation, recorded by a dark field microscope for 16 min.
